# Supplementary material for: Angiotensin-(1–7) suppresses airway inflammation and airway remodeling via inhibiting ATG5 in allergic asthma
Source: Springer Nature journal article supplement (doi:10.1186/s12890-023-02719-7), 2023-11-02

**Supplementary figure 1:** The results of control siRNA or ATG5 siRNA transfection were confirmed by western blotting. (a) Expression of ATG5 protein in BEAS-2B cells. (b) Expression of ATG5 protein in HBSMC cells. ns: no significance, \*\* $p < 0.01$ .

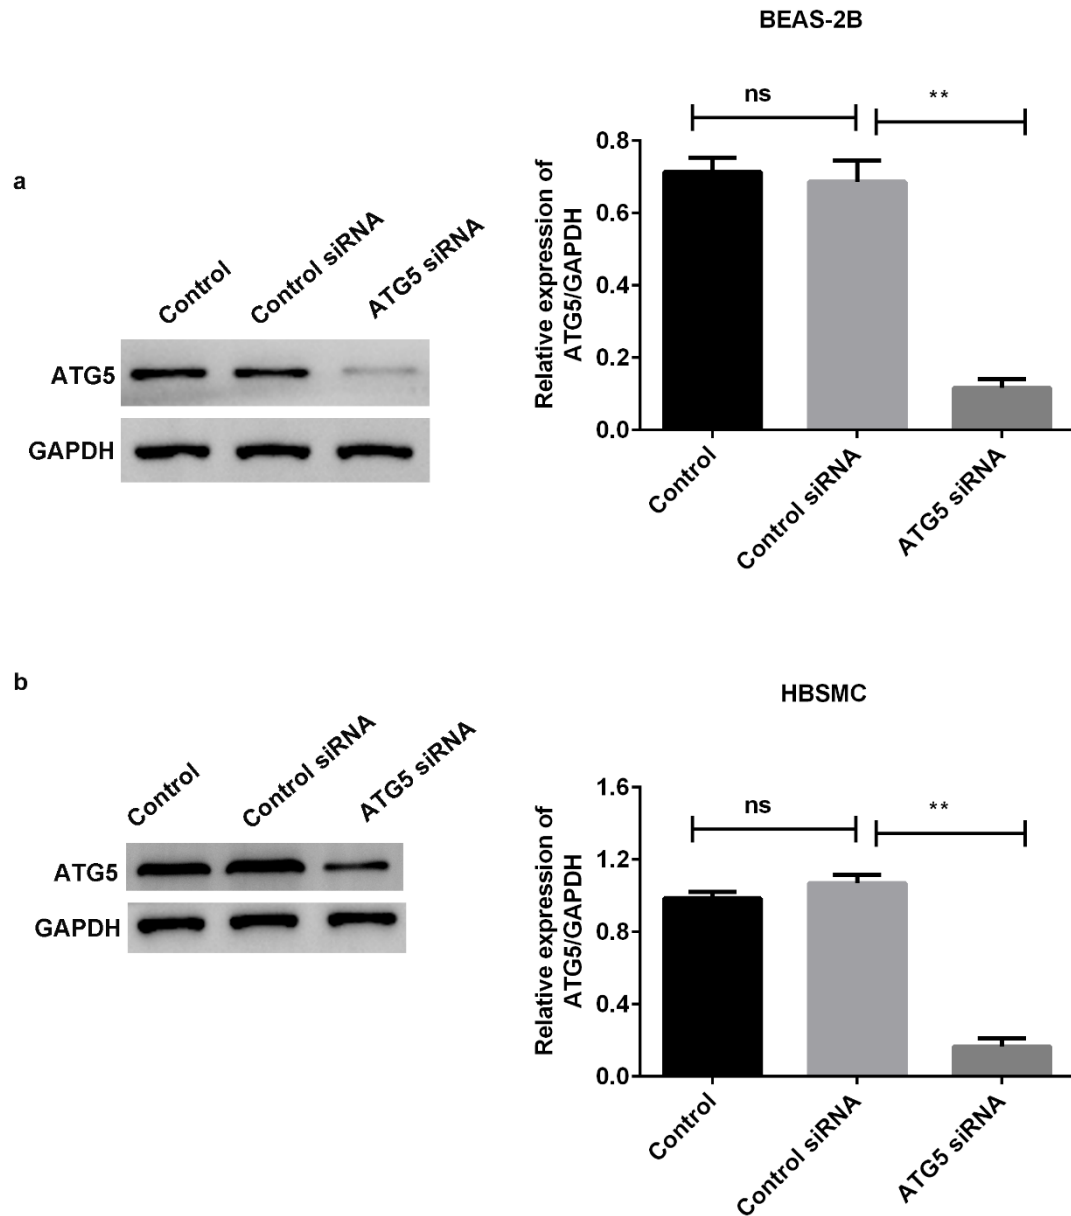

**Supplementary figure 2:** The results of vector control or ATG5 cDNA transfection were confirmed by western blotting. (a) Expression of ATG5 protein in BEAS-2B cells. (b) Expression of ATG5 protein in HBSMC cells. ns: no significance, \*\* $p < 0.01$ .

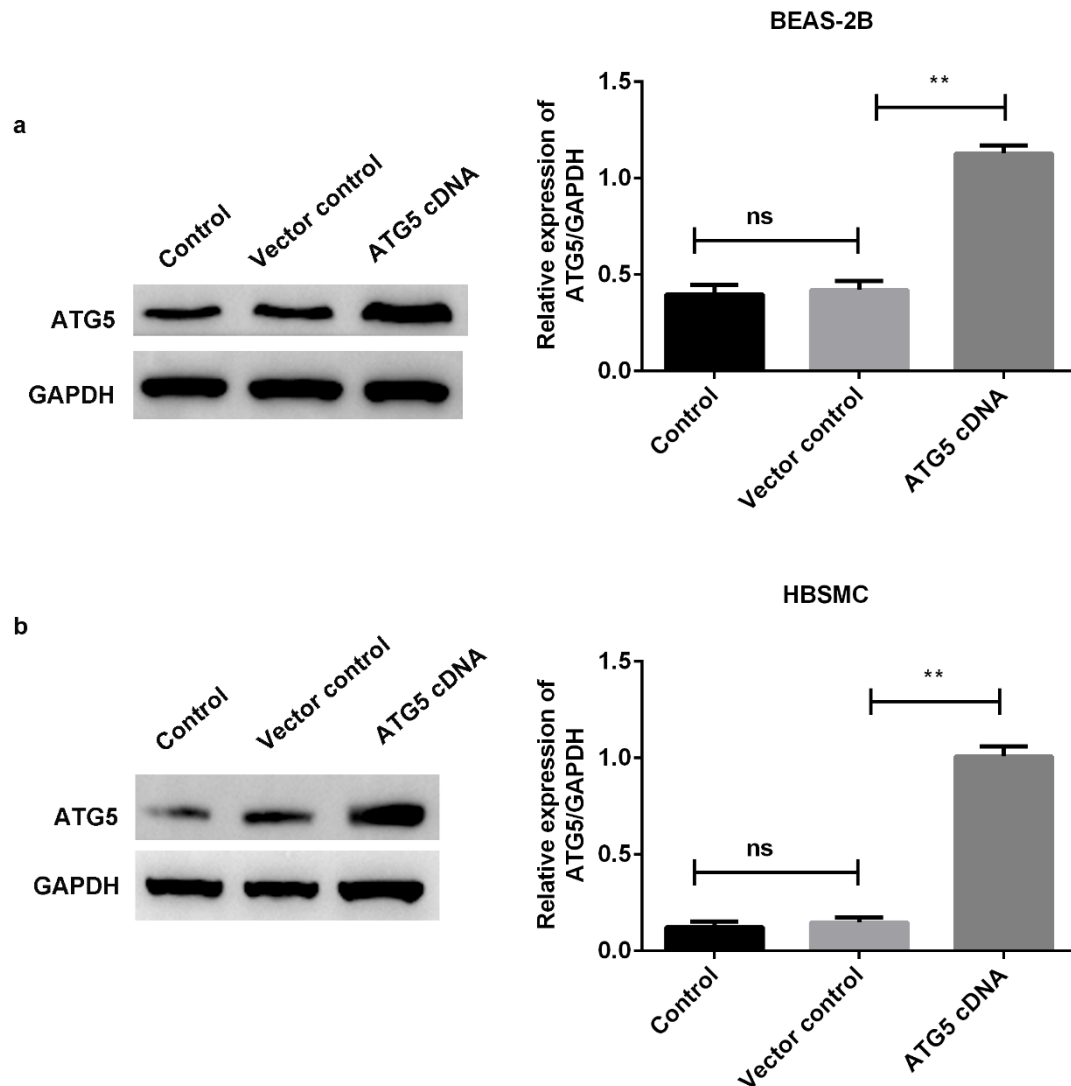

**Supplementary figure 3:** Effects of 20  $\mu$ M Ang-(1-7) treatment alone on secretion of cytokines in cells. (a) Levels of IL-25 and IL-33 in BEAS-2B cells. (b) Expression of TGF- $\beta$ 1 and  $\alpha$ -SMA protein in HBSMC cells. ns: no significance.

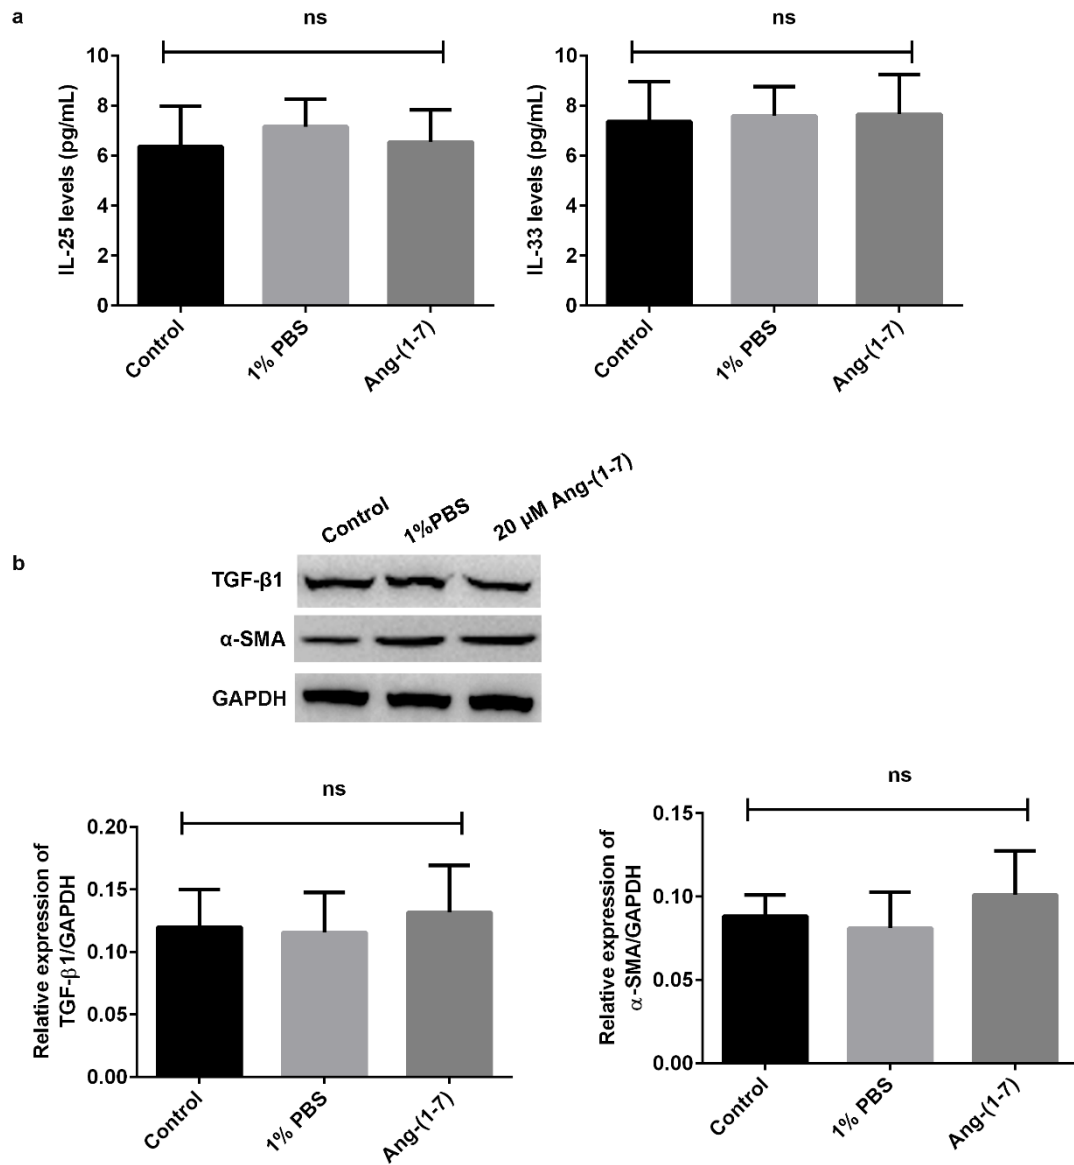

Supplement: MOESM1 [file 12890_2023_2719_MOESM1_ESM.pdf]
